# Supplementary material for: Balanced engagement of activating and inhibitory receptors mitigates human NK cell exhaustion
Source: JCI Insight. 2022 Aug 8;7(15):e150079. doi: 10.1172/jci.insight.150079 (PMC9462468; doi:10.1172/jci.insight.150079)
Supplement: Supplemental data [file jciinsight-7-150079-s007.pdf]

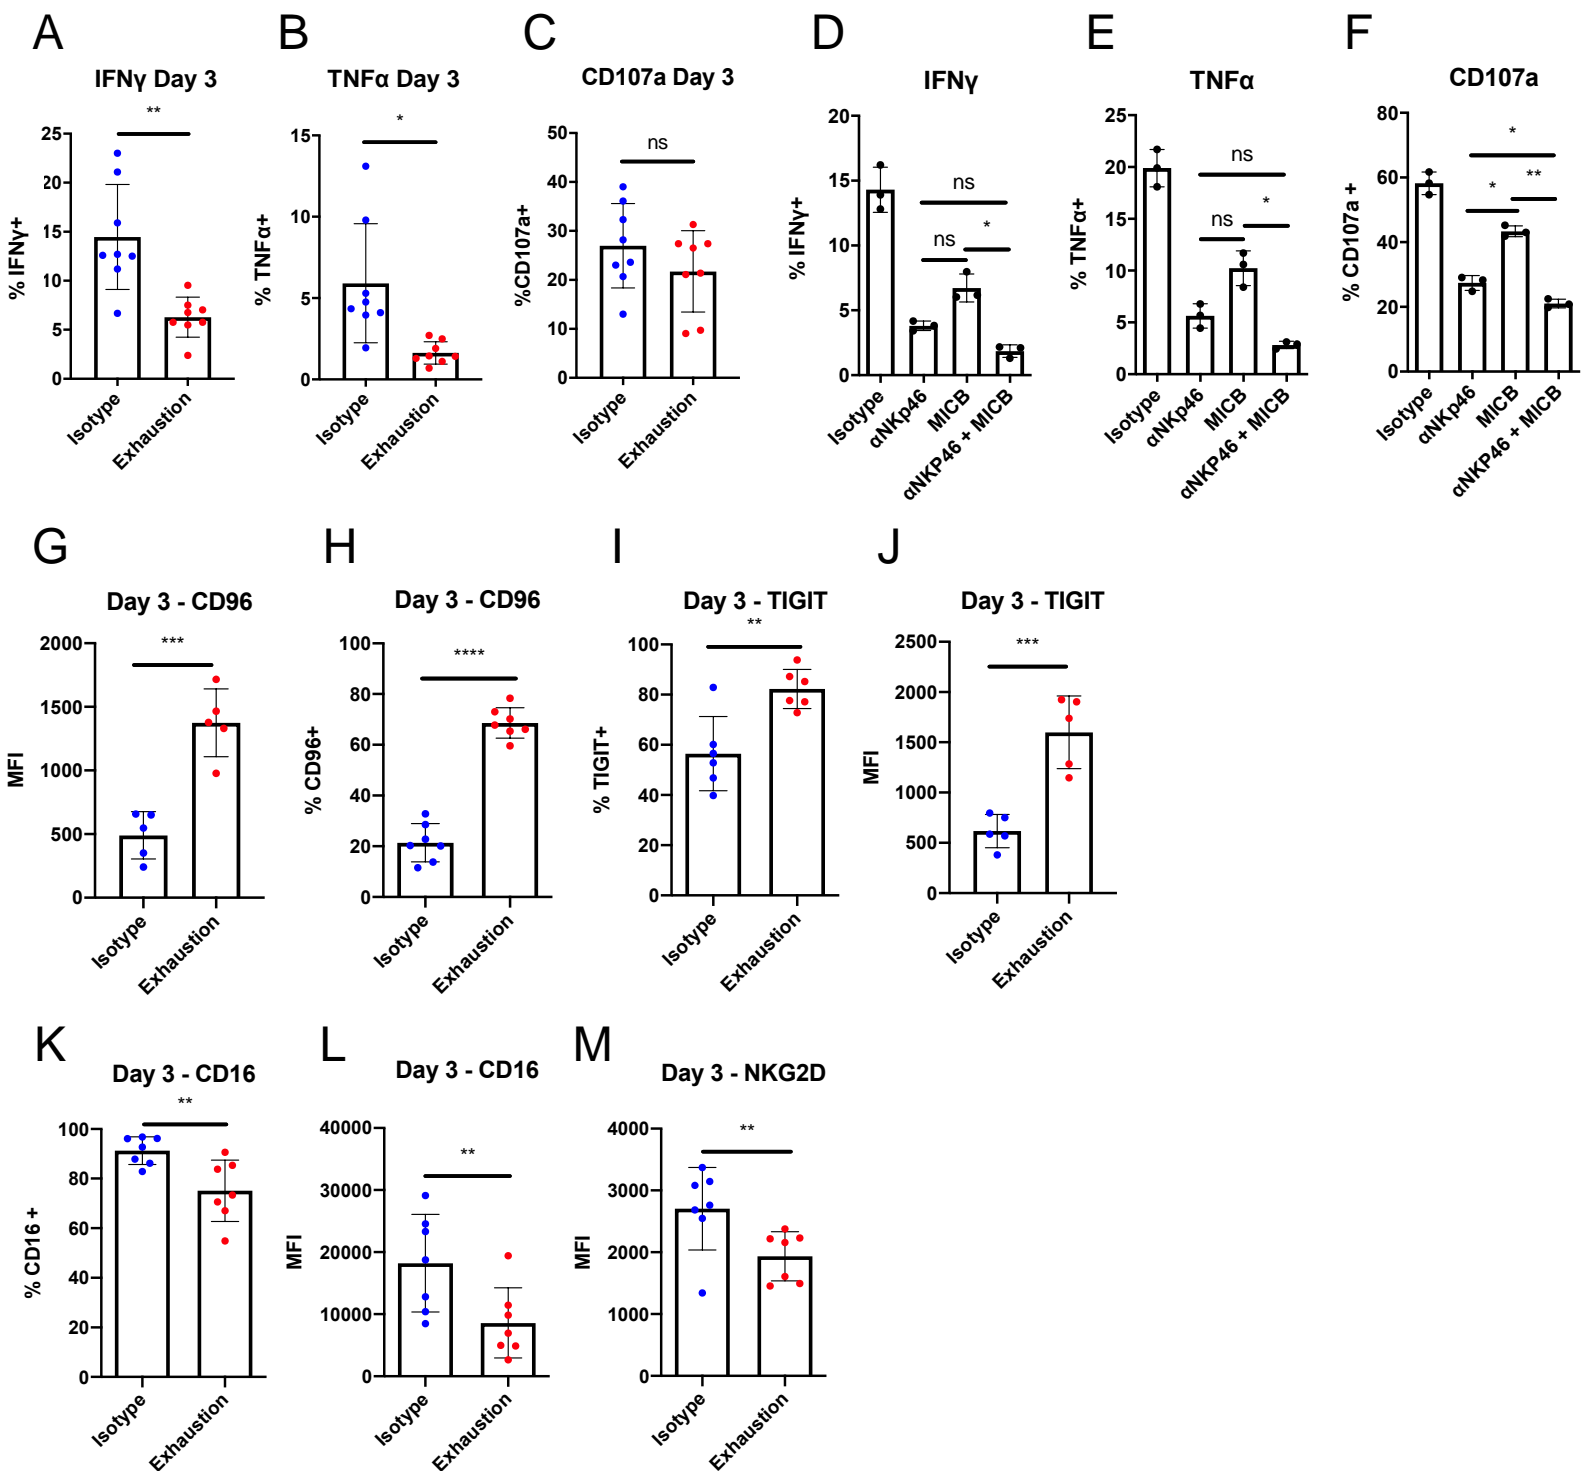

**SUPPLEMENTARY FIGURE 1.** (A-C) NK cells harvested from isotype-coated and exhaustion plates (day 3) were incubated with K562 targets for four hours (E/T: 2:1). Production of IFN $\gamma$  (A) ( $n=8$ ) and TNF $\alpha$  (B) ( $n=8$ ) and degranulation (CD107a [C]) ( $n=8$ ) were measured via flow cytometry. (D-F) NK cells were stimulated through NKp46 and NKG2D independently and simultaneously for 7 days. Production of IFN $\gamma$  (D) ( $n=3$ ) and TNF $\alpha$  (E) ( $n=3$ ) and degranulation (CD107a [F]) ( $n=3$ ) were measured via flow cytometry. (G-M) On day 3 of stimulation, flow cytometry was used to stain for several receptors. Percent of parent and MFI are included where indicated. CD96 (G-H), TIGIT (I-J), CD16 (K-L), NKG2D (M); ( $n=7$ ); \* $P \leq 0.05$ ; \*\* $P < 0.01$ ; \*\*\* $P < 0.001$ ; \*\*\*\* $P < 0.0001$  ns, not significant.

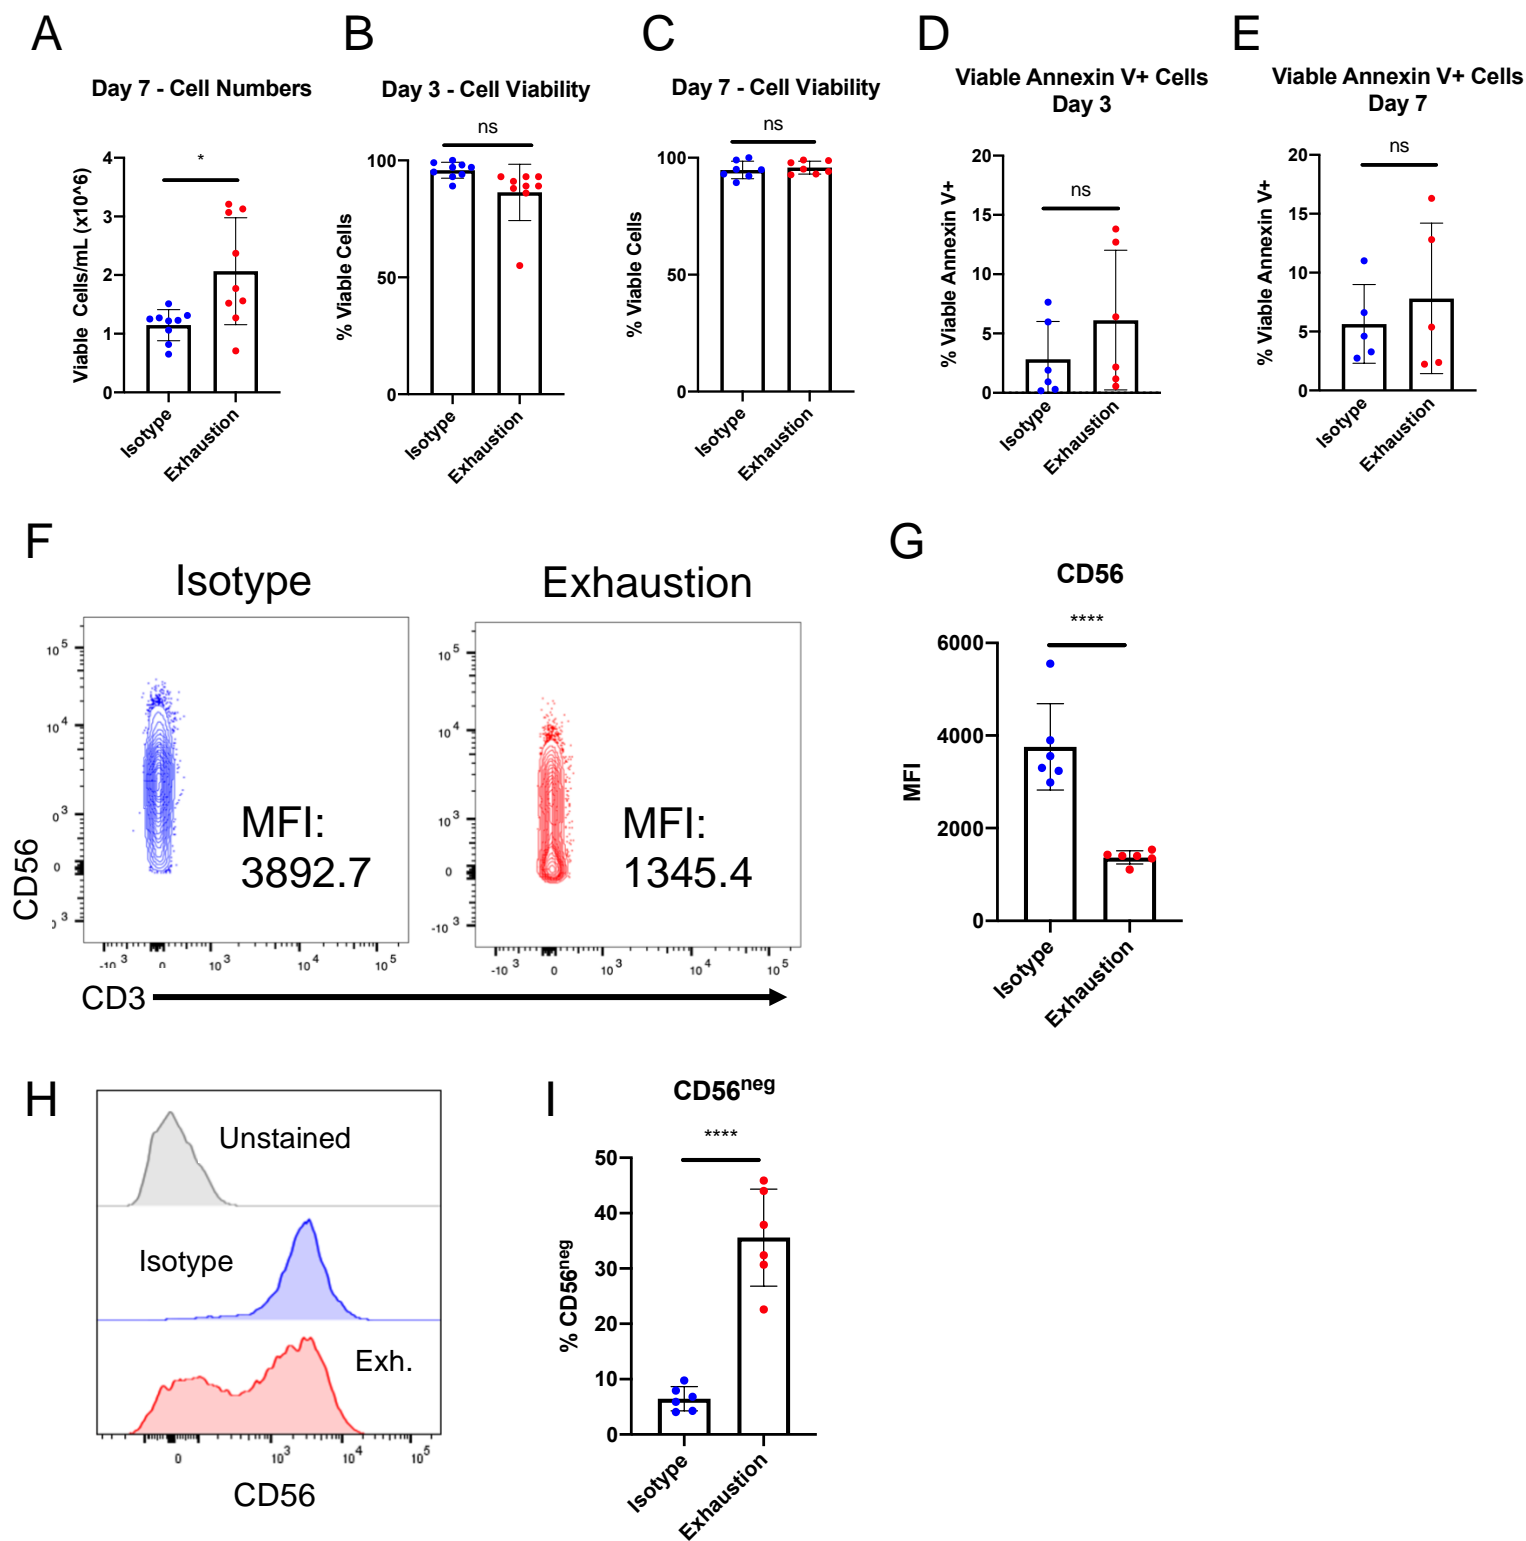

**SUPPLEMENTARY FIGURE 2.** (A) Viable cells were quantified at day 7 using the Beckman Coulter ViCell counter. (Starting cell density =  $1 \times 10^6$  cells/mL,  $n=9$ .) Paired  $t$  tests were used for comparisons.  $*P \leq 0.05$ . (B-C) Viability of NK cells harvested from isotype-coated and exhaustion plates (harvested at days 3 [B] [ $n=9$ ] and 7 [C] [ $n=7$ ]) was assessed via Trypan blue uptake. (D-E) NK cells harvested from isotype-coated

and exhaustion plates (days 3 [D] [ $n=6$ ] and 7 [E] [ $n=5$ ]) were stained with Annexin V to assess apoptosis. (Analysis was performed via flow cytometry.) (F) Representative contour plots of CD56 expression for isotype (blue) and exhausted (red) cells. Analysis was performed via flow cytometry: NK cells were live, CD3- CD56+. (G) Quantification of pooled results ( $n=7$ ). (F) Histogram of CD56 expression. (I) Quantification of pooled results ( $n=6$ ) \*\*\* $P < 0.001$ ; \*\*\*\* $P < 0.0001$  ns, not significant.

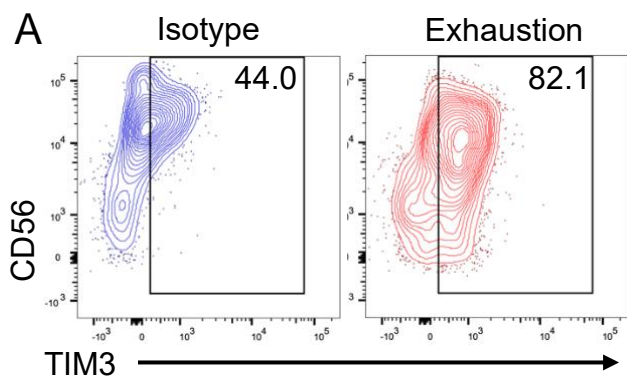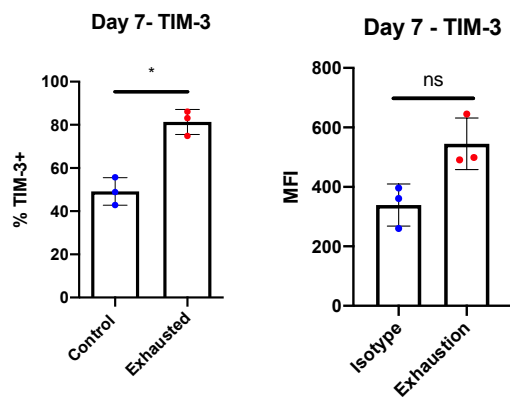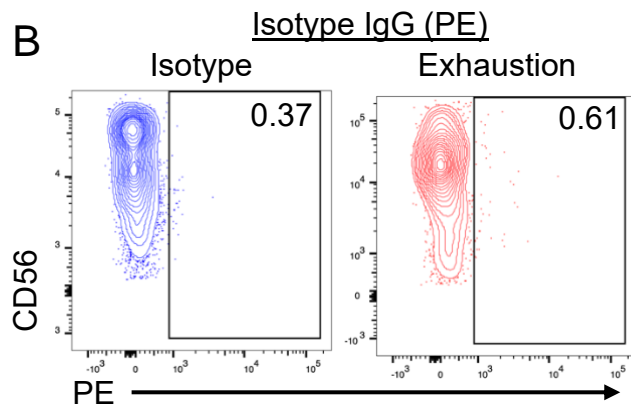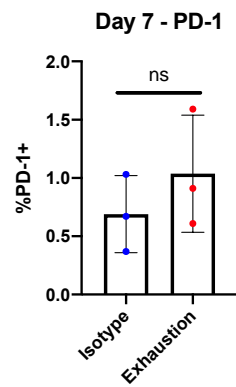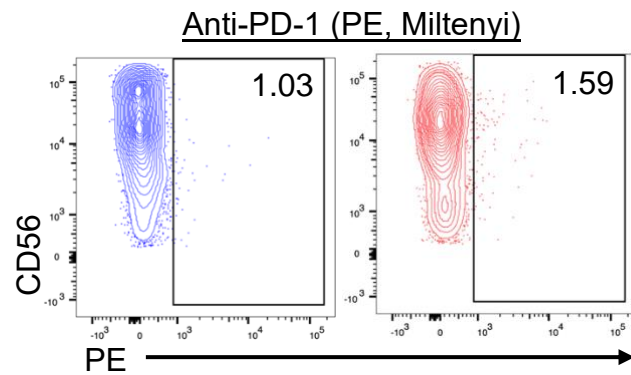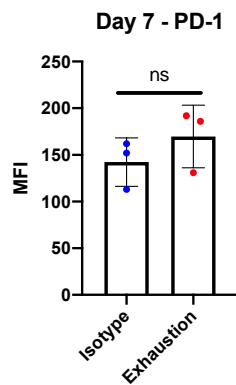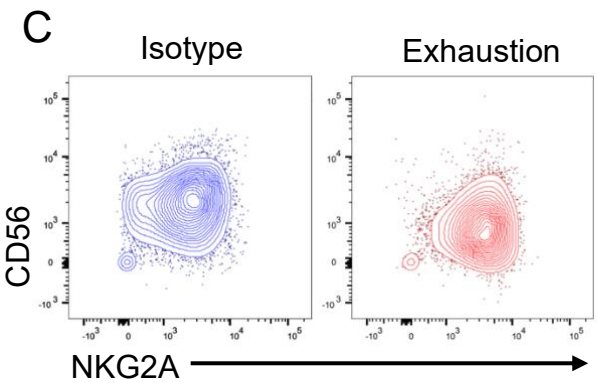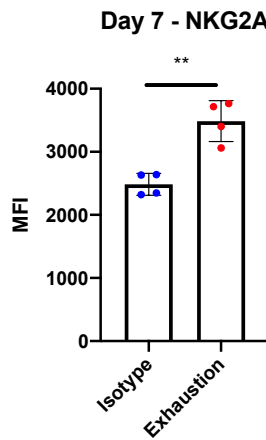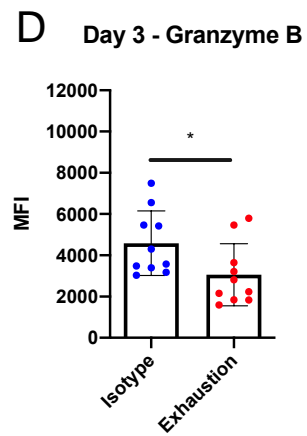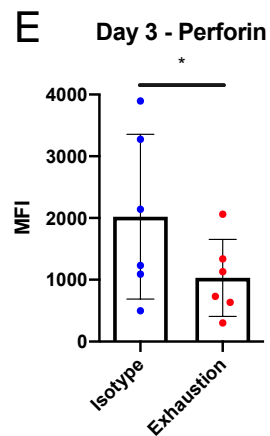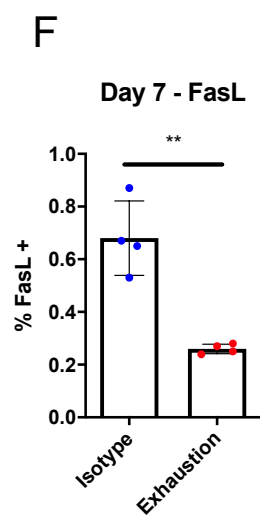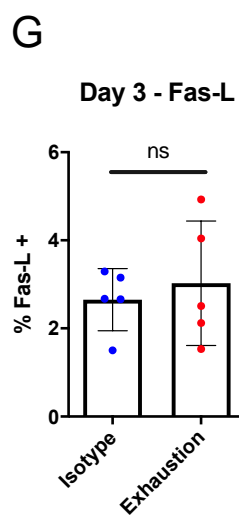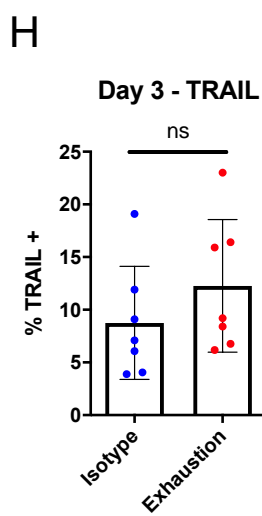

**SUPPLEMENTARY FIGURE 3. (A-H)** NK cells were harvested from isotype-coated and exhaustion plates and the expression of various receptors was analyzed via flow cytometry: TIM3, Day 7 (A) ( $n=3$ ) representative dot plots, MFI data, and % of parent included; PD-1, Day 7 (B) ( $n=3$ ) PE-conjugated isotype control, representative dot plots, MFI data, and % of parent included; NKG2A (C) ( $n=4$ ) representative dot plots and MFI data included; Granzyme B, Day 3 (D) ( $n=10$ ); Perforin, Day 3 (E) ( $n=6$ ); Fas-L, Day 7 and 3 (F-G) ( $n=4$ ,  $n=5$ ); TRAIL, Day 3 (H) ( $n=8$ ). \* $P \leq 0.05$ ; \*\* $P < 0.01$ ; ns, not significant.

## CD56

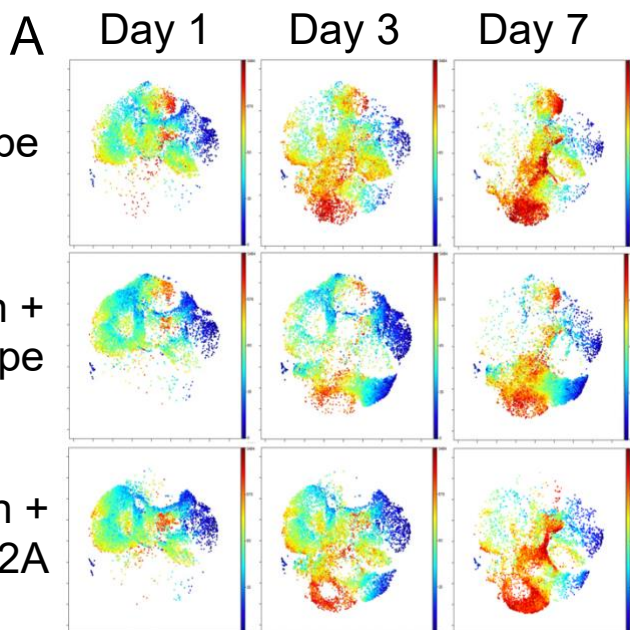

## Ki67

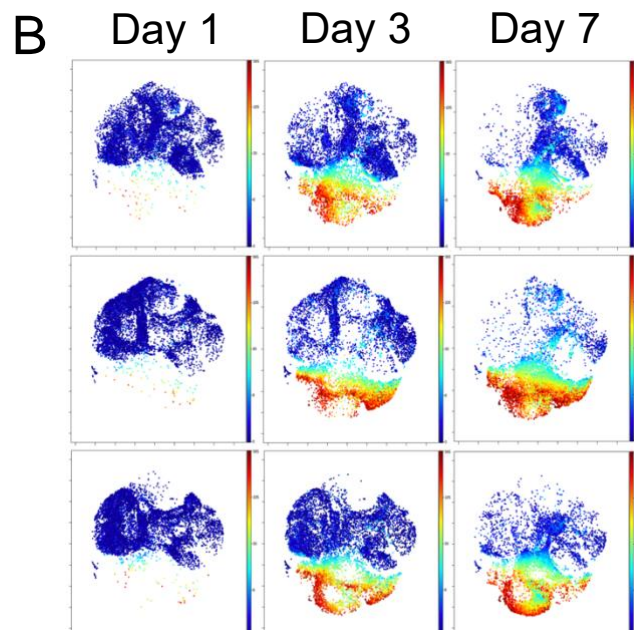

## T-bet

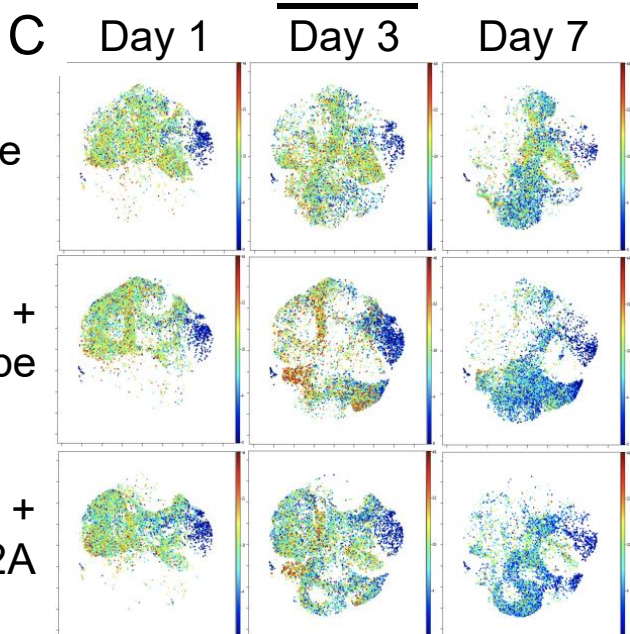

## TRAIL

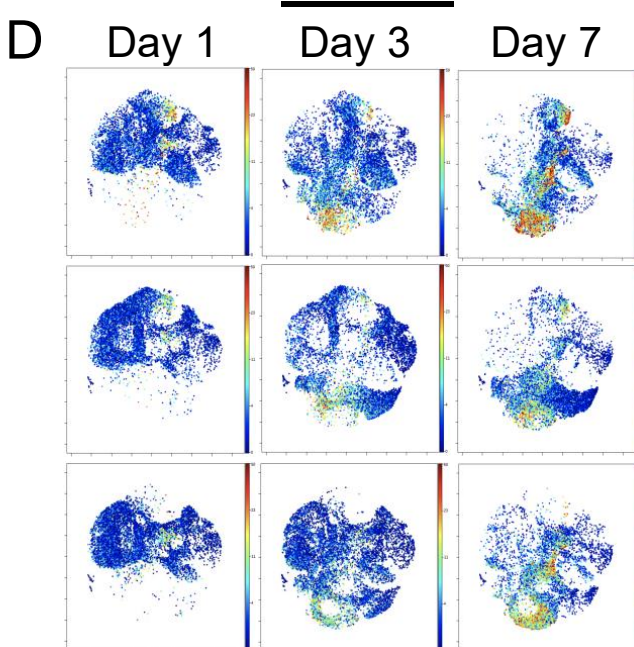

## TIGIT

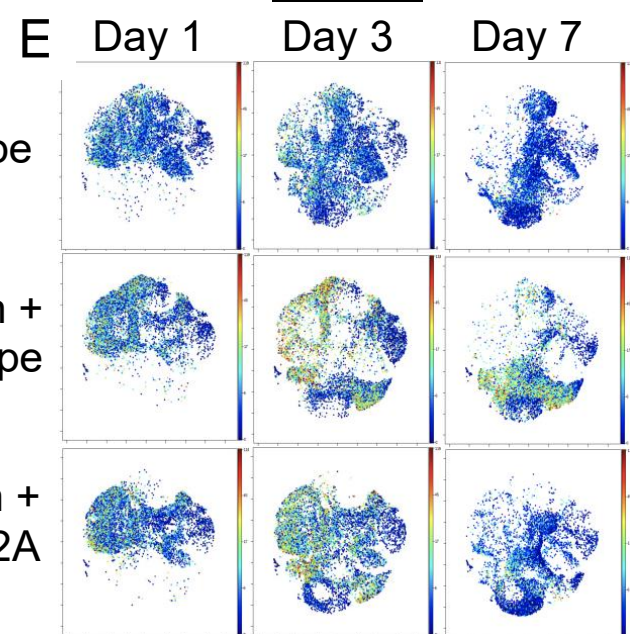

## 2B4

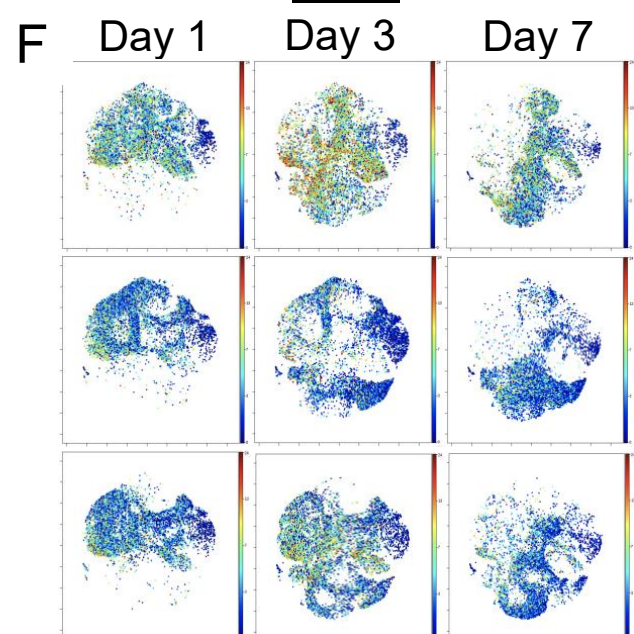

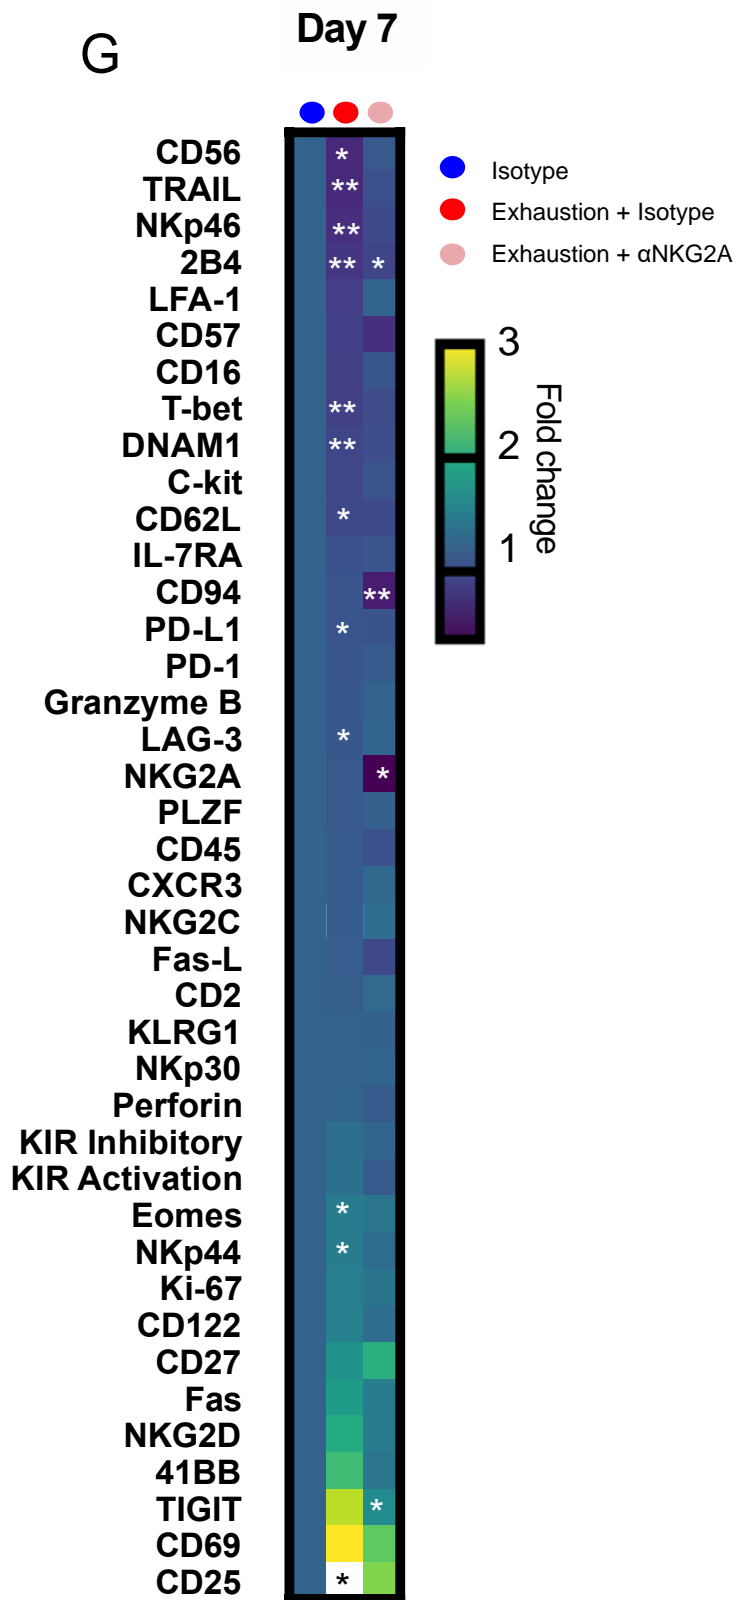

**SUPPLEMENTAL FIGURE 4. (A-G)** At day 7 of stimulation, cells from three donors were analyzed via mass cytometry (CyTOF). viSNE analysis was performed for several markers: CD56 (A), Ki67 (B), T-bet (C), TRAIL (D), TIGIT (E), and 2B4 (F). Heatmap (G) indicates fold change relative to isotype mean metal intensity (MMI). \*  $P \leq 0.05$ ; \*\*  $P < 0.01$ ; data that is not significant was left unlabeled ( $n=3$ ).

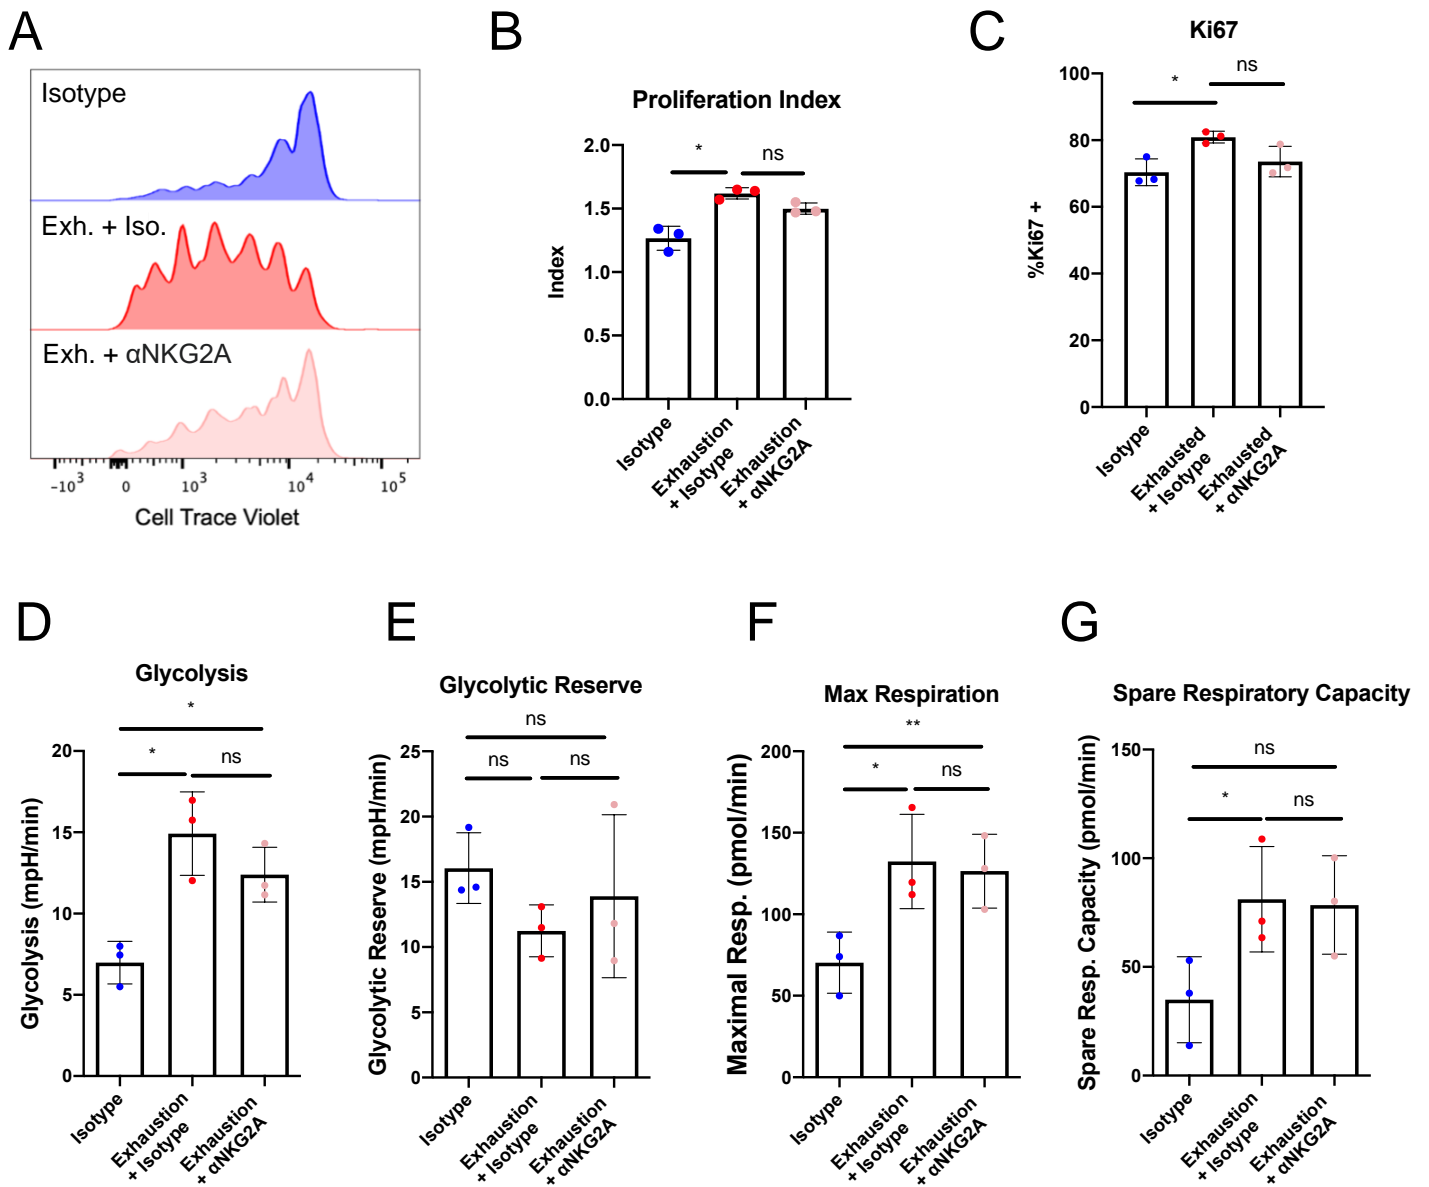

**SUPPLEMENTAL FIGURE 5.** (A) NK cells were stained with Cell Trace Violet and cultured on stimulatory plates for 7 days, as previously described. Cells were analyzed via flow cytometry 7 days later. (B) Proliferative indices were calculated using FlowJo V10 (C) NK cells were stained with Ki67 and analyzed via flow cytometry ( $n=3$ ). (D-G) NK cells were harvested at day 7 and stained for Ki67 ( $n=3$ ). (D-G) NK cells were immobilized on tissue culture plates and subjected to live-cell metabolic assays using Agilent's Seahorse XFe24 Analyzer. Extracellular acidification rates (ECAR) were measured following injection of glucose (G), oligomycin (O), FCCP (F), and Antimycin A + Rotenone (A+R). Oxygen consumption rates were measured following injection of glucose (G), oligomycin (O), FCCP (F), and Antimycin A + Rotenone (A+R). Graphical representations of glycolysis (D), glycolytic reserve (E), maximal respiration (F), and spare respiratory capacity (G) are pictured ( $n=3$ ) ONE way ANOVA was used for comparisons. \* $P \leq 0.05$ ; \*\* $P < 0.01$ ; ns, not significant.

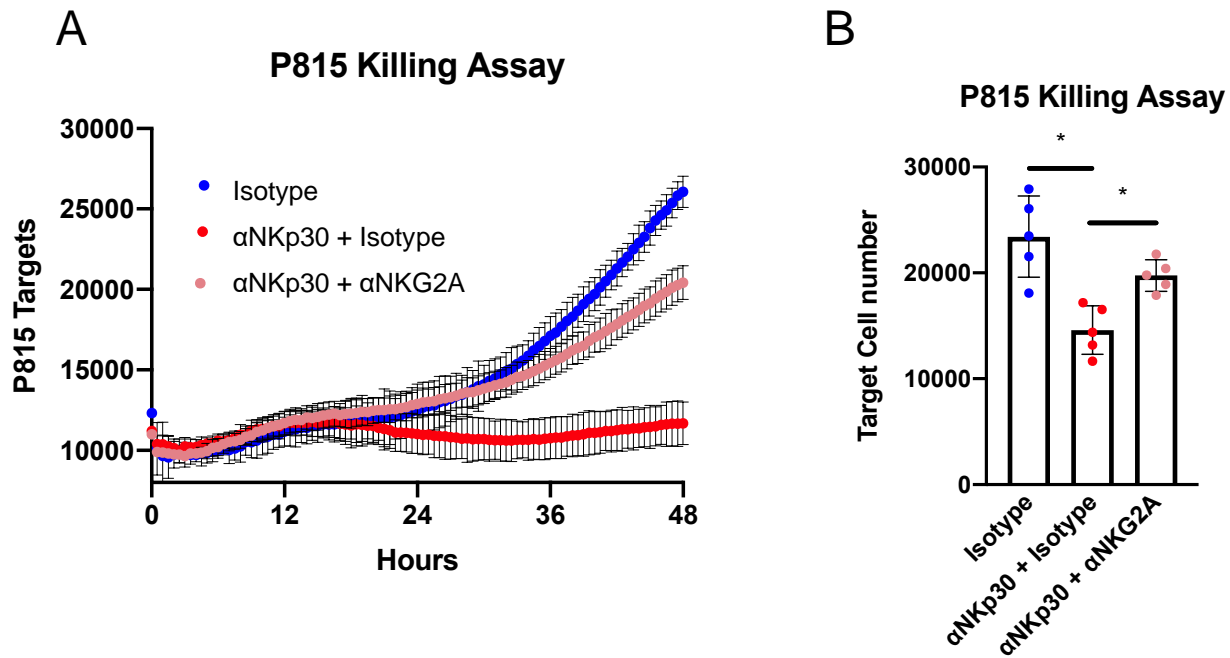

**SUPPLEMENTAL FIGURE 6.** (A) P815 targets were labelled with Cell trace Far Red and coated with either anti-NKp30 and anti-NKG2A or anti-NKp30 and isotype IgG. P815 cells coated in isotype alone served as a negative control. NK cells were incubated with P815 target cells (E/T 2:1) and target cell growth was tracked using the Incucyte live cell imaging platform. (B) The number of target cells remaining after 48 hours was quantified for every condition and E/T ratio ( $n=5$ ).  $*P \leq 0.05$ .

A

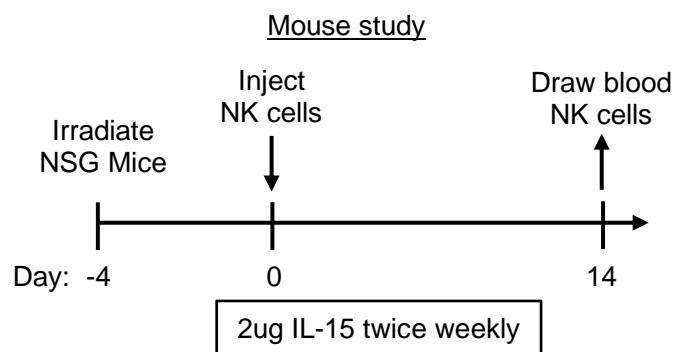

B

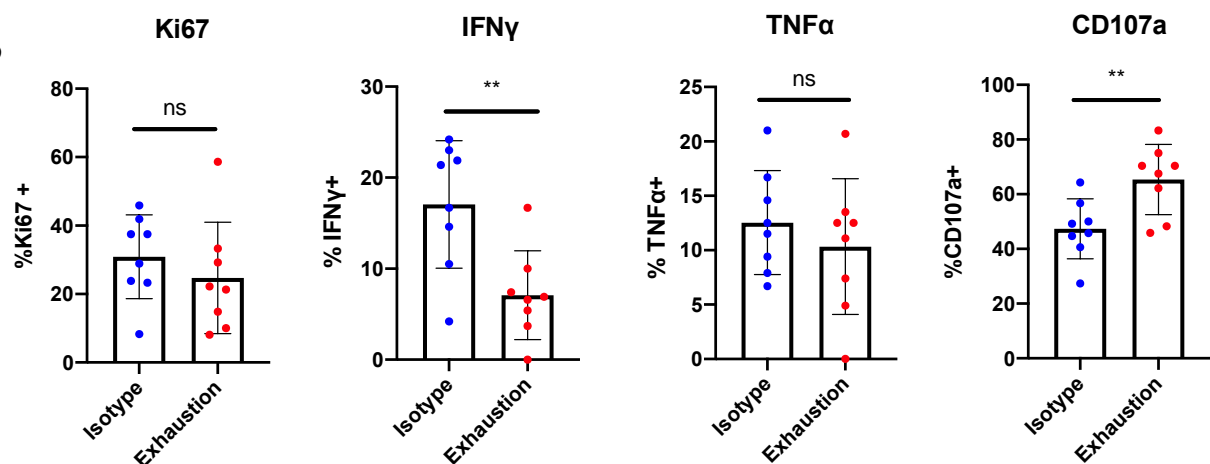

C

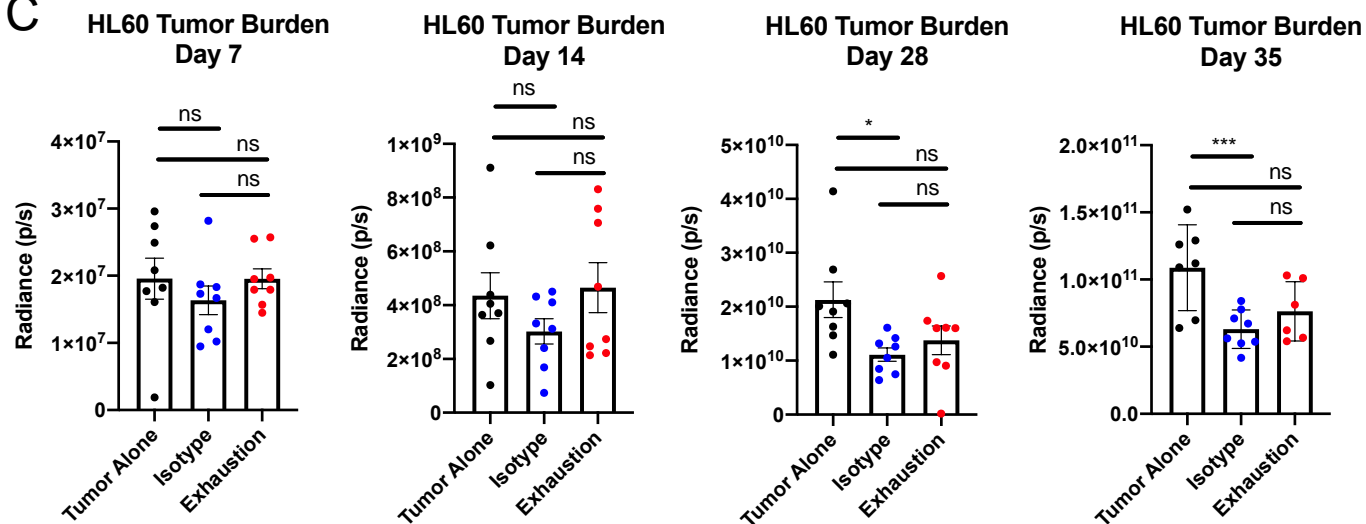

D

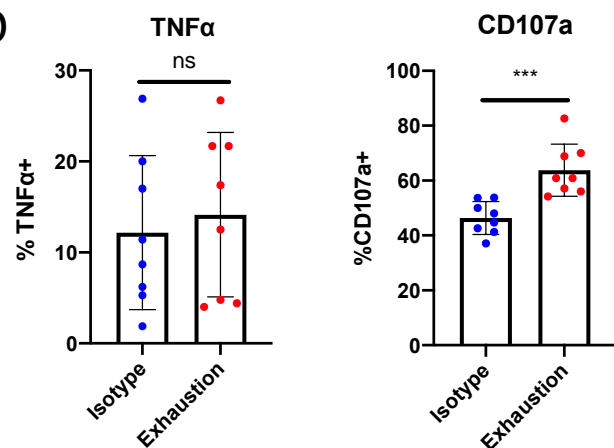

**SUPPLEMENTAL FIGURE 7.** (A) Schematic representing experimental design: sublethally irradiated NSG mice were injected (i.v.) with  $1 \times 10^6$  NK cells. NK cells had been incubated for 7 days on plates with either isotype IgG (control) or anti-NKp46 and MICA/B as previously described. (B) 14 days post NK cell injection in the non-tumor model, blood was drawn, and NK cells were restimulated with K562 leukemia cells for 4 hours as previously described. Ki67, IFN $\gamma$ , TNF $\alpha$ , and CD107a expression was assessed via flow cytometry. NK cells were CD45h $^{+}$  CD56 $^{+}$  CD3 $^{-}$ . Paired *t* tests were used for comparisons ( $n=8$ ). \*\* $P < 0.01$ ; ns, not significant. (C) Tumor burden at several time points was measured via BLI. One way ANOVA was used for comparisons. \* $P < 0.05$ ; \*\*\* $P < 0.001$ ; ns, not significant ( $n=8$ ). (D) 14 days post NK cell injection in the HL60 tumor model, blood was drawn, and NK cells were restimulated with K562 leukemia cells for 4 hours as previously described. TNF $\alpha$  and CD107a expression was assessed via flow cytometry. NK cells were CD45h $^{+}$  CD56 $^{+}$  CD3 $^{-}$ . Paired *t* tests were used for comparisons ( $n=8$ ). \*\*\* $P < 0.001$ ; ns, not significant.

A

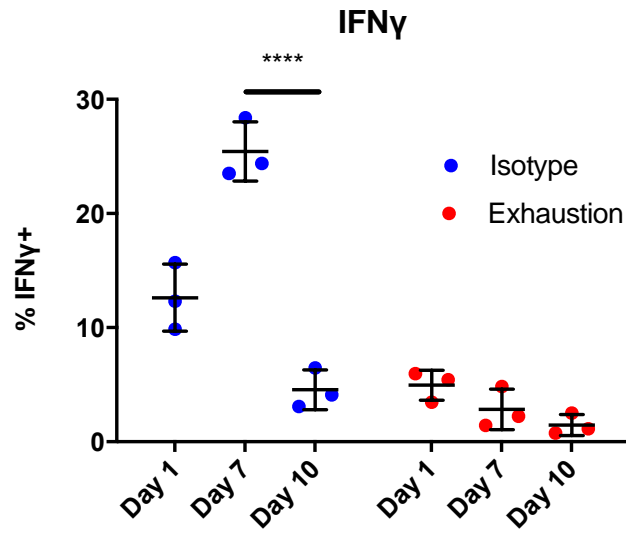

**SUPPLEMENTARY FIGURE 8. (A)** NK cells harvested from isotype-coated and exhaustion plates (days 1, 7, and 10) were incubated with K562 targets for four hours (E/T: 2:1). IFN $\gamma$  production was measured via flow cytometry. Paired *t* tests were used for comparisons (*n*=3). \*\*\*\**P* < 0.0001.

| Marker              | Metal | Catalog no. | Clone           |
|---------------------|-------|-------------|-----------------|
| CD3                 | 141Pr | 3141019B    | UCHT1           |
| KIR Activating Pool | 142Nd | 201142A     | KIR2DL1(143211) |
| C-Kit               | 143Nd | 3143001B    | 104D2           |
| CD69                | 144Nd | 3144018B    | FN50            |
| KIR Inhibitory Pool | 145Nd | 201145A     | KIR2DS1 (1127B) |
| CD8a                | 146Nd | 3146001B    | RPA-T8          |
| Fas Ligand          | 147Sm | 201147A     | NOK-1           |
| CD274 (PD-L1)       | 148Nd | 3148017B    | 29E.2A3         |
| CD25 (IL-2R)        | 149Sm | 3149010B    | 2A3             |
| PLZF                | 150Nd | 201150A     | 6318100         |
| CD2                 | 151Eu | 3151003B    | TS1/8           |
| CD95/Fas            | 152Sm | 3152017B    | DX2             |
| CD62L (L-selectin)  | 153Eu | 3153004B    | DREG-56         |
| CD16                | 154Sm | 3154016B    | MBSA43          |
| CD27                | 155Gd | 3155001B    | L128            |
| CXCr3               | 156Gd | 3156004B    | G025H7          |
| CD137/4-1BB         | 158Gd | 3158013B    | 4B4-1           |
| CD337 (NKp30)       | 159Tb | 3159017B    | Z25             |
| NKG2C               | 160Gd | 201160A     | 2098A           |
| Eomes               | 161Dy | 201161A     | 644730          |
| CD335 (NKp46)       | 162Dy | 3162021B    | BAB281          |
| CD56 (NCAM)         | 163Dy | 3163007B    | NCAM 16.2       |
| TRAIL               | 164Dy | 201164A     | RIK2            |
| CD223/LAG-3         | 165Ho | 3165037B    | 11C3C65         |
| CD314 (NKG2D)       | 166Er | 3166016B    | ON72            |
| NKp44               | 167Er | 201167A     | P-448           |
| Ki-67               | 168Er | 3168007B    | B56             |
| CD159a (NKG2A)      | 169Tm | 3169013B    | Z199            |
| CD122               | 170Er | 3170004B    | Tu27            |
| CD226 DNAM-1        | 171Yb | 3171013B    | DX11            |
| CD57                | 172Yb | 3172009B    | HCD57           |
| Granzyme B          | 173Yb | 3173006B    | GB11            |
| CD279 (PD-1)        | 174Yb | 3174020B    | EH12.2H7        |

|                |       |          |         |
|----------------|-------|----------|---------|
| Perforin       | 175Lu | 3175004B | B-D48   |
| CD127 (IL-7Ra) | 176Yb | 3176004B | A019D5  |
| TIGIT          | 209Bi | 3209002B | MBSA43  |
| CD45           | 89Y   | 3089003B | HI30    |
| CD94           | 111CD | 201111A  | DX22    |
| LFA-1          | 112CD | 201112A  | M24     |
| KLRG-1         | 113CD | 201113A  | 14C2A07 |
| 2B4            | 114CD | 201114A  | C1.7    |
| T-bet          | 116CD | 201116A  | 4B10    |

**SUPPLEMENTARY TABLE 1.** Antibodies used for Mass Cytometry by time-of-flight (CyTOF). Marker, metal tag, catalog number, and clone ID for each antibody are listed.
